# Supplementary material
Source: Springer Nature journal article supplement (https://www.springermedizin.de/resource/supplementary/12872_2013_623_MOESM3_ESM.pdf/9430378)

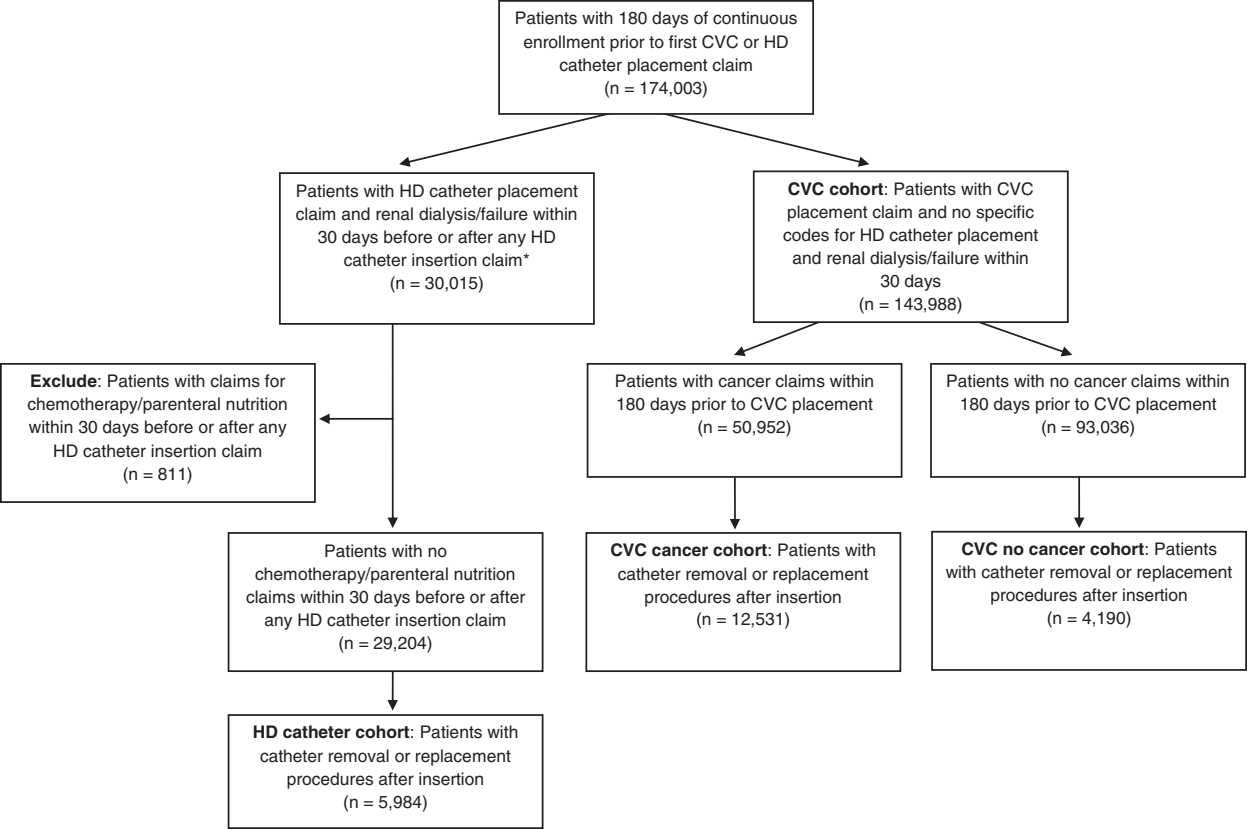

Supplement: MOESM3 [file 9430378]
